# Supplementary material
Source: Springer Nature journal article supplement (https://www.springermedizin.de/resource/supplementary/12947_2012_447_MOESM3_ESM.pdf/9555782)

### LAA emptying function

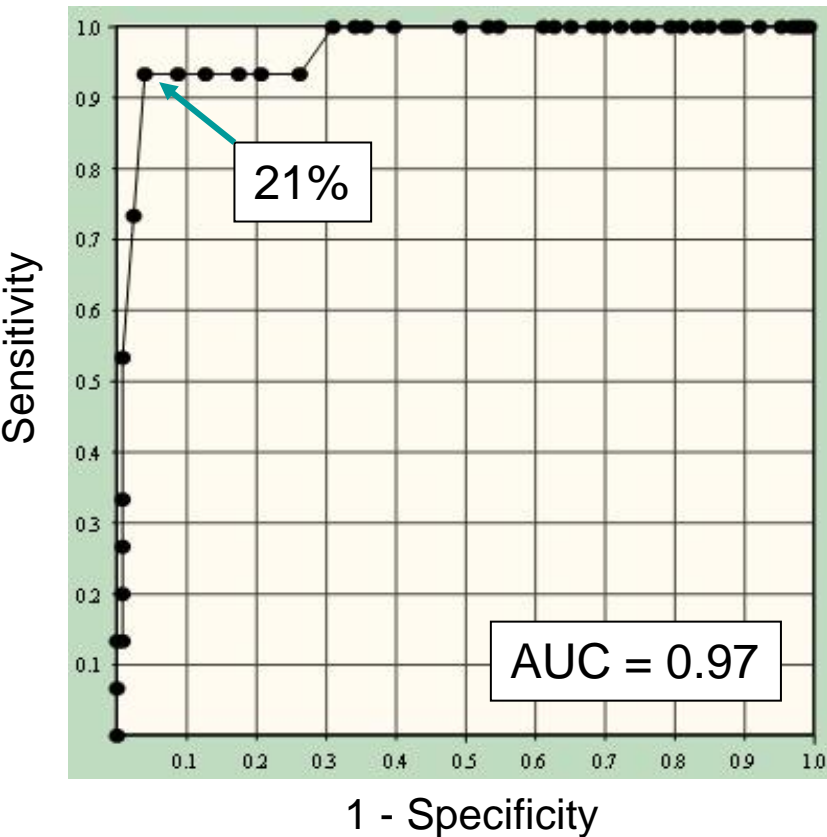

### LAA peak emptying flow velocity

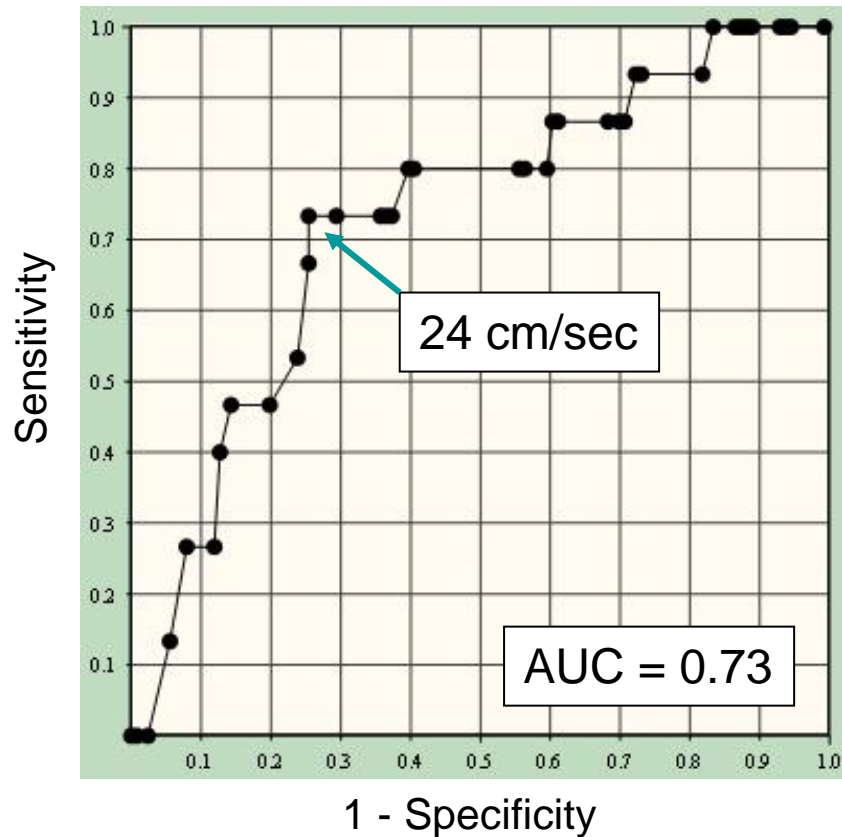

Supplement: MOESM3 [file 9555782]
